# Supplementary material
Source: MDPI journal article supplement (https://www.mdpi.com/2079-6439/5/1/13)
Supplement: s1 [file s1]

Supplementary Materials: Design of
Temperature-Responsive Nanofiber Meshes
for Cell Storage Application

Tomohiro Maeda, Young-Jin Kim, Takao Aoyagi and Mitsuhiro Ebara

**Table S1.** Preparation of PNIPAAm fiber meshes with different molecular weights and polymer concentrations by electrospinning.

|  | **Molecular Weight** | **Mw/Mn** | **Polymer Conc.** | **Voltage** | **Feed Rate** | **Distance** |
| --- | --- | --- | --- | --- | --- | --- |
| **Run** |  |  | **(wt%)** | **(kV)** | **(mL/h)** | **(cm)** |
| 1 | 10,200 | 1.3 | 1 | 10 | 0.3 | 15 |
| 2 | 10,200 | 1.3 | 3 | 10 | 0.3 | 15 |
| 3 | 10,200 | 1.3 | 5 | 10 | 0.3 | 15 |
| 4 | 10,200 | 1.3 | 10 | 10 | 0.3 | 15 |
| 5 | 17,100 | 3.1 | 1 | 10 | 0.3 | 15 |
| 6 | 17,100 | 3.1 | 3 | 10 | 0.3 | 15 |
| 7 | 17,100 | 3.1 | 5 | 10 | 0.3 | 15 |
| 8 | 17,100 | 3.1 | 10 | 10 | 0.3 | 15 |
| 9 | 231,000 | 3.3 | 1 | 10 | 0.3 | 15 |
| 10 | 231,000 | 3.3 | 3 | 10 | 0.3 | 15 |
| 11 | 231,000 | 3.3 | 5 | 10 | 0.3 | 15 |
| 12 | 231,000 | 3.3 | 10 | 10 | 0.3 | 15 |
| 13 | 538,800 | 3.4 | 1 | 10 | 0.3 | 15 |
| 14 | 538,800 | 3.4 | 3 | 10 | 0.3 | 15 |
| 15 | 538,800 | 3.4 | 5 | 10 | 0.3 | 15 |
| 16 | 538,800 | 3.4 | 10 | 10 | 0.3 | 15 |


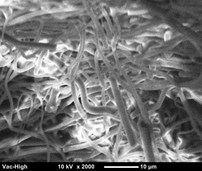


**Figure S1.** SEM image of PNIPAAm fiber mesh after adding hot water (40 °C).


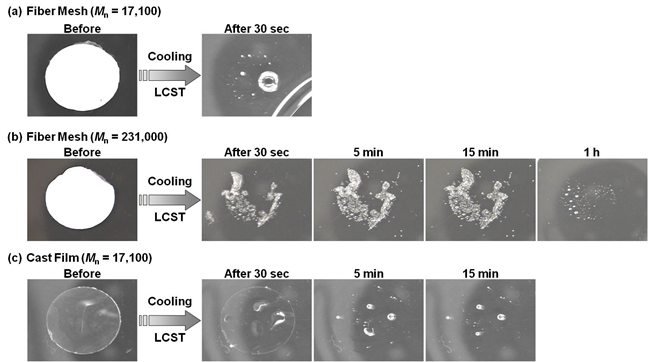


**Figure S2.** Time-dependent images of dissolution behavior of (**a**) PNIPAAm nanofiber meshes with *M*n = 17,100 and (**b**) *M*n = 231,000; and (**c**) a cast film after adding cold water (20 °C).

© 2016 by the authors. Submitted for possible open access publication under the
terms and conditions of the Creative Commons Attribution (CC-BY) license (http://creativecommons.org/licenses/by/4.0/).
